# Supplementary material for: Juxtacellular opto-tagging of hippocampal CA1 neurons in freely moving mice
Source: eLife. 2022 Jan 26;11:e71720. doi: 10.7554/eLife.71720 (PMC8791633; doi:10.7554/eLife.71720)
Supplement: Figure 1—figure supplement 1—source data 1. [file elife-71720-fig1-figsupp1-data1.xlsx]

## Sheet: Panel C
Trial number	Evoked_spike_lag (s)
1	0.0024
2	0.00236
3	0.0024
4	0.00236
5	0.00236
6	0.0024
7	0.00236
8	0.00236
9	0.00236
10	0.0024
11	0.00248
12	0.0024
13	0.0024
14	0.0024
15	0.0024
16	0.0024
17	0.00236
18	0.00236
19	0.00232
20	0.00232
21	0.00216
22	0.00228
23	0.00232
24	0.00236
25	0.0024
26	0.0024
27	0.00244
28	0.00244
29	0.0024
30	0.00248

## Sheet: Panel E
Trial number	Evoked_spike_lag (s)
1	0.00316
2	0.00256
3	0.00296
4	0.00276
5	0.00296
6	0.00256
7	0.00276
8	0.00288
9	0.00284
10	0.00288
11	0.00308
12	0.0028
13	0.00288
14	0.003
15	0.0028
16	0.00272
17	0.0026
18	0.003
19	0.00284
20	0.00276
21	0.003
22	0.0028
23	0.00292
24	0.00244
25	0.00288
26	0.003
27	0.00288
28	0.00288
29	0.00268
30	0.00268

## Sheet: Panel H
Trial number	Evoked_spike_lag (s)
1	0.00252
2	0.00372
3	0.00224
4	0.00224
5	0.00228
6	0.0024
7	0.0022
8	0.0024
9	0.00244
10	0.00356
11	0.00224
12	0.00228
13	0.00264
14	0.00224
15	0.00236
16	0.0022
17	0.000720001
18	0.00348
19	0.00252
20	0.00236
21	0.00216
22	0.0024
23	0.00252
24	0.00364
25	0.00208
26	0.00216
27	0.00252
28	0.00224
29	0.00232
30	0.00372

## Sheet: Panel F
ISI histogram (top)		Average Spike Waveform (bottom)
Spike_times (s)		Voltage (V)
0.21856		0
0.24368		1.59625e-06
0.70156		1.97245e-07
0.746		9.40852e-07
2.44544		1.02107e-06
2.89436		1.63233e-06
2.958		2.58318e-06
3.14392		6.21355e-06
3.24788		2.43074e-05
3.31184		0.000136264
3.51772		0.000336352
3.56624		0.000537858
3.605		0.000883387
3.62416		0.0011276
3.63876		0.000883212
3.6544		0.000424556
3.67288		-3.69665e-07
4.1318		-0.000280227
4.35256		-0.000414276
4.38292		-0.000456926
6.66616		-0.000445239
6.69948		-0.000393371
6.73356		-0.000316884
6.75268		-0.000235085
6.7928		-0.00015748
6.81996		-9.22266e-05
6.88524		-3.73575e-05
6.8984		5.02191e-06
6.92916		3.74077e-05
6.95868		6.00587e-05
7.05616		7.51611e-05
7.06624		8.49407e-05
7.09112		9.17671e-05
7.109		9.35567e-05
7.19516		9.38912e-05
7.20572		9.21119e-05
7.2322		9.04334e-05
7.32056		9.00733e-05
7.36352		8.77302e-05
7.3936		8.43012e-05
7.43912		7.96354e-05
7.47464		7.6929e-05
7.49352		7.52879e-05
7.50604		7.42835e-05
7.58464		7.24043e-05
7.61648		6.98044e-05
7.6262		6.80422e-05
8.2656		6.73008e-05
8.2992		6.49118e-05
8.32796		6.49518e-05
8.36624		6.38824e-05
8.42376		6.2533e-05
8.4992
8.50584
8.54192
8.70632
8.76688
8.85884
8.8756
8.90024
8.91092
8.95084
8.96344
8.97976
8.9922
9.02204
9.0718
9.16776
9.17284
9.20624
9.21332
9.24084
9.28448
9.33008
9.3694
9.396
9.40264
9.4838
9.5072
9.6328
9.7638
9.84964
9.96756
10.0013
10.1557
10.2685
10.3604
10.5907
10.6802
10.8004
10.8343
10.8456
10.9326
11.1077
11.1589
11.2168
11.2289
11.2941
11.3349
11.351
11.4113
11.4872
11.5171
11.5457
11.6788
11.7104
11.8274
11.9067
11.9634
12.059
12.1084
12.1541
12.1873
12.2308
12.2718
12.4823
12.5368
12.5824
12.6147
12.6288
12.6929
12.7517
12.8548
12.9015
12.9564
13.0389
13.0764
13.1392
13.1759
13.2678
13.3052
13.3992
13.4148
13.4886
13.6206
13.7014
13.7198
13.7995
13.8343
14.0521
14.063
15.4324
15.6826
15.8056
15.8352
15.8954
15.9328
16.1812
16.2129
16.3463
16.3715
16.4784
16.8895
17.0888
17.4863
17.6435
17.6761
17.7273
17.8643
17.8769
17.9526
18.0022
18.0278
18.0769
18.086
18.1632
18.1983
18.2601
18.3253
18.3542
18.4095
18.4491
18.4828
18.5703
18.6079
18.6917
18.7098
18.7417
18.9762
18.9879
19.0515
19.1106
19.1358
19.1684
19.2077
19.4364
19.4832
19.7038
19.7741
19.853
19.9418
20.0445
20.5209
20.6421
20.6768
20.7728
20.8179
20.8862
20.9388
20.9754
21.0242
21.0714
21.0888
21.1344
21.1672
21.2044
21.2662
21.3002
21.3349
21.4131
21.9307
22.551
22.8486
22.9506
23.0023
27.0703
27.078
27.175
27.2993
27.4238
27.5464
28.0818
28.1608
28.2688
28.2973
28.3781
28.4574
28.646
28.6797
28.7461
28.7884
28.9365
29.0409
29.104
29.239
29.324
29.35
29.4186
29.4603
29.6534
29.6943
29.796
29.8227
29.9281
29.9767
30.0247
30.0544
30.1315
30.2322
30.2776
30.3885
30.406
30.4385
30.5473
30.6901
30.766
30.7989
30.843
30.9127
30.9424
31.0493
31.1282
31.1463
31.1758
31.191
31.2049
31.2766
31.3384
31.3612
31.4845
31.6666
31.7
31.7268
31.7772
31.885
31.9721
31.9998
32.0729
32.0976
32.1248
32.1563
32.2545
32.3374
32.3856
32.4086
32.4314
32.5023
33.0117
33.0836
33.2501
33.2982
33.3782
33.6544
33.7582
33.8328
33.8892
33.9043
33.9104
33.9182
33.9493
33.9832
33.9898
34.0627
34.0976
34.1035
34.1356
34.17
34.2045
34.232
34.2826
34.3278
34.3567
34.3946
34.4366
34.4723
34.4773
34.5132
34.5565
34.5986
34.6516
34.6679
34.6996
34.7733
34.8191
34.8463
34.9306
34.9752
35.0359
35.1679
35.1888
35.3321
35.3656
35.4453
35.4928
35.5215
35.6191
35.6786
35.7334
35.7635
35.7803
35.8397
35.8773
35.8846
35.9552
35.9792
35.9874
36.0148
36.068
36.0781
36.0967
36.2916
36.334
36.3864
36.4374
36.4904
36.776
36.8162
36.8574
37.0705
37.1572
37.3002
37.309
37.4267
37.5771
37.7664
37.8229
37.9031
37.9829
38.0498
38.0946
38.1485
38.2926
38.5263
39.5205
41.5173
41.5941
41.6434
41.6837
41.7152
41.8034
41.8375
41.9227
41.9538
42.0811
42.31
42.4254
42.4463
42.4589
42.6339
42.8146
42.9307
42.9818
43.1526
43.4024
43.5703
43.6118
43.627
43.6785
43.7845
43.8279
43.9021
43.9778
43.9972
44.0054
44.0281
44.0362
44.1521
44.2267
44.2575
44.2782
44.4166
44.5407
44.5734
44.6278
46.9364
48.2804
48.3096
48.321
48.3632
48.4122
48.4844
48.5545
48.572
48.5814
48.5877
48.6014
48.6141
48.6844
48.7687
48.8321
48.8797
48.9158
48.9512
48.9686
49.0423
49.0801
49.1148
49.1304
49.1393
49.1694
49.1773
49.2162
49.2509
49.3085
49.3973
49.4447
49.5398
49.6227
49.6591
49.6935
49.7545
49.7884
49.8368
49.9218
49.9519
50.007
50.0302
50.0362
50.0675
50.1172
50.1288
50.2056
50.3504
50.4644
50.569
50.7234
50.7571
50.9864
51.0467
51.1019
51.1282
51.157
51.2463
51.4121
51.5338
51.5632
51.6622
52.6281
52.7568
52.8868
53.0076
53.1741
53.4177
53.5616
53.8554
54.0052
54.0905
54.1274
54.2356
54.2598
54.3897
54.4454
54.4774
54.5167
54.5371
54.5534
54.618
54.6642
54.709
54.7313
54.7963
54.803
54.8834
54.9156
54.9338
55.4364
55.4581
55.4732
55.5451
55.5653
55.6238
55.6711
55.762
55.8344
55.866
55.9046
55.9432
55.9571
56.0146
56.0532
56.1067
56.1513
56.2774
56.337
56.3622
56.45
56.516
56.7173
56.7461
56.7542
56.8176
57.0246
57.0608
57.0931
57.1601
57.4883
57.5382
57.5504
57.5911
57.6282
57.6806
57.711
57.7192
57.7496
57.7989
57.89
57.9262
57.9309
57.9533
57.9596
58.0179
58.0512
58.1196
58.1559
58.1843
58.2915
58.523
58.5339
58.5619
58.569
58.6442
58.6867
58.718
58.7938
58.8281
58.8693
58.9529
59.256
59.3704
59.384
59.4496
59.4582
59.4956
59.5894
59.6288
59.7373
59.7859
59.9715
60.1106
60.2304
60.4003
60.4416
60.6967
60.9188
60.9527
61.0123
61.0462
61.1326
61.1715
61.1765
61.3697
61.39
61.4274
61.4817
61.5539
61.6433
61.6814
61.7331
61.742
61.7658
61.8854
61.9213
62.0152
62.1121
62.1956
62.2325
62.6463
62.6828
62.7858
62.8055
62.9049
62.9307
63.0669
63.208
63.2292
63.2633
63.3366
63.3822
63.418
63.6618
63.8423
63.956
64.0324
64.2188
64.4326
65.9485
65.9867
66.1636
66.2946
66.4278
66.6052
67.0442
67.1223
67.2758
67.4004
67.5441
68.8572
68.9125
68.9477
69.0194
69.0557
69.176
69.3159
69.3323
69.4064
69.6196
69.6836
69.7181
69.7474
69.991
70.1418
70.1988
70.2938
70.4036
70.4242
70.4562
70.5364
70.6
70.6372
70.706
70.7597
70.8794
70.9054
70.9492
70.9696
70.9776
71.9546
72.0182
74.4536
74.4988
74.5347
74.5644
74.5978
74.6321
74.6881
74.7117
74.7665
74.8138
74.8481
74.876
74.9284
74.9622
74.9919
74.9988
75.0884
75.1204
75.1559
76.0384
76.1226
76.1347
76.1746
76.2916
76.3166
76.3569
76.4152
76.4544
76.6066
76.6386
76.6885
76.7304
76.9939
77.2145
77.3252
77.4097
77.4436
77.557
77.5982
77.6359
77.6733
77.7004
78.368
78.5463
78.6334
78.7031
78.7455
78.8774
78.9767
79.1449
79.2349
79.3359
79.5704
79.6104
79.6771
79.7636
79.7964
79.8448
79.8842
79.9138
79.9477
80.0404
80.1785
80.2714
80.3196
80.406
80.4932
80.5588
80.6478
80.8546
80.97
81.0039
81.127
81.1844
81.2269
81.2646
81.5211
81.7446
82.1327
82.2054
82.2527
82.2874
82.3434
82.3767
82.39
82.4252
82.4674
82.49
82.5071
82.5282
82.6048
82.6324
82.6518
82.8037
82.831
82.893
82.9526
83.0777
83.5622
83.6232
83.6398
83.6617
83.6874
84.7876
84.8126
84.9192
85.0635
85.111
85.2409
85.3379
85.4389
85.4708
85.515
85.5519
85.5776
85.623
85.6582
85.6862
85.7928
85.8132
85.8482
85.9472
85.9789
86.0076
86.0249
86.0366
86.0565
86.086
86.0968
86.1318
86.1822
86.1976
86.2291
86.2447
86.3167
86.3664
86.4176
86.4284
86.4701
86.4787
86.5432
86.5956
86.7668
86.8082
86.8373
86.9825
87.0648
87.0793
87.1134
87.1344
87.1406
87.1528
87.2503
87.2829
87.3952
87.4026
87.5168
87.6571
87.6975
89.0494
89.0665
89.1381
89.1864
89.2216
89.261
89.2876
89.3088
89.3812
89.389
89.4041
89.4211
89.48
89.4912
89.9553
90.1682
90.1912
90.2712
90.4252
90.4384
90.4711
90.5286
90.5514
90.5649
90.5952
90.6372
90.6682
90.7012
90.7404
90.7539
90.7632
90.7877
90.8124
90.9024
90.9282
90.9355
91.0111
91.0202
91.0435
91.2769
91.5858
91.6139
91.7639
91.8794
91.8846
91.9142
91.9362
91.9672
91.9716
91.9997
92.0035
92.0556
92.0773
92.09
92.0977
92.1618
92.1977
92.2085
92.2141
92.2823
92.309
92.3414
92.3677
92.5067
92.565
92.599
92.6225
92.6416
92.6908
92.7071
92.7181
92.7365
92.7446
92.8243
92.8417
92.8717
92.9408
92.9543
92.9784
93.0104
93.1121
93.1372
93.1772
93.2604
93.2725
93.2941
93.3174
93.455
93.5189
93.5771
93.6408
93.7545
94.1579
94.2234
94.2666
94.6213
94.7423
94.7842
95.2978
95.6474
95.7173
95.7705
96.0189
96.1265
96.1605
96.258
96.2793
96.4256
96.5619
96.6179
96.6537
96.6873
96.8516
96.9509
97.0788
97.0844
97.1102
98.9052
98.9381
98.9904
99.026
99.2803
99.3222
99.3664
99.3924
99.4508
99.4853
99.6179
99.7739
99.8018
99.8423
99.8732
99.935
99.9602
100.09
100.187
100.421
100.535
100.566
100.638
100.686
100.705
100.722
100.787
100.825
100.84
100.918
100.948
100.973
101.086
101.189
101.215
101.322
101.381
101.398
101.448
101.481
101.609
101.617
101.656
101.721
101.738
101.757
101.779
101.791
101.871
101.898
101.91
102.022
102.037
102.166
102.252
102.3
102.352
102.379
102.393
102.479
102.602
102.733
102.83
102.873
102.939
103.08
103.241
103.368
103.448
103.56
103.856
103.978
104.005
104.322
104.412
104.444
104.461
104.507
104.534
104.587
104.606
104.627
104.702
104.803
104.839
104.88
104.944
104.955
105.042
105.056
105.173
105.188
105.213
105.27
105.397
105.433
105.683
105.723
105.8
105.812
105.88
105.985
106.039
106.055
106.08
106.106
106.152
106.188
106.222
106.263
106.277
106.294
106.306
106.337
106.365
106.39
106.413
106.489
106.51
106.518
106.613
106.998
107.039
107.08
107.63
107.803
107.825
107.941
107.958
108.092
108.107
108.149
108.211
108.24
108.276
108.324
108.415
108.425
108.952
109.052
109.317
109.347
109.361
109.406
109.478
109.509
109.589
109.699
109.708
109.838
109.857
109.96
109.993
110.073
110.196
110.324
110.348
110.378
110.411
110.422
110.605
110.838
110.85
110.917
110.962
111.038
111.045
111.075
111.102
111.201
111.207
111.232
111.247
111.348
111.372
111.431
111.47
111.529
111.628
111.648
111.768
111.986
112.013
112.105
112.132
112.172
112.209
112.232
112.245
112.298
112.312
112.382
112.414
112.486
112.583
112.615
112.649
112.76
113.049
113.106
113.116
113.154
113.22
113.254
113.297
113.342
113.357
113.382
113.449
113.462
113.485
113.529
113.541
113.595
114.025
114.477
115.279
115.315
115.993
118.215
118.311
120.835
126.213
126.297
126.429
126.477
126.492
126.601
126.729
132.342
139.981
140.161
140.215
140.269
140.575
140.908
141.139
141.269
144.763
147.638
147.883
148.002
148.024
148.141
148.18
148.269
148.503
148.516
148.53
148.551
148.566
148.781
148.79
148.816
148.917
148.974
149.009
149.016
149.028
149.12
149.212
149.233
149.269
149.372
149.442
149.47
149.504
149.537
149.558
149.584
149.606
149.633
149.647
149.672
149.696
149.738
149.774
149.789
149.812
149.826
149.884
149.897
150.002
150.02
150.028
150.127
150.199
150.235
150.24
150.277
150.302
150.359
150.435
152.06
152.111
152.122
152.145
152.155
154.04
154.052
154.08
154.09
154.13
154.166
154.19
154.233
154.24
154.346
154.4
154.41
154.461
154.486
154.499
154.567
154.597
154.659
154.695
154.79
154.932
154.965
155.021
155.044
155.055
155.198
155.385
155.413
155.476
155.49
155.522
155.587
155.599
155.621
155.71
155.864
155.963
156.107
156.146
156.183
156.3
156.402
156.488
157.129
157.152
157.211
157.237
157.273
157.348
157.381
157.387
157.476
157.513
157.57
157.598
157.631
157.81
157.83
157.883
157.901
157.971
158.008
158.18
158.253
158.282
158.337
158.365
158.454
158.548
158.566
158.584
158.63
158.658
158.703
158.78
158.812
158.849
158.871
158.906
159.022
159.21
159.233
159.265
159.297
159.326
159.346
159.431
159.461
159.469
159.491
159.534
159.575
159.581
159.612
159.7
159.754
159.792
159.824
159.867
159.884
159.958
160.046
160.059
160.094
160.145
160.189
160.196
160.228
160.286
160.32
160.325
160.427
160.598
160.653
160.66
160.69
160.701
160.737
160.859
160.893
160.948
160.976
161.01
161.135
161.178
161.224
161.328
161.445
161.471
161.561
161.68
161.71
161.81
161.827
161.877
161.916
161.945
161.976
162.006
162.096
162.445
162.603
162.712
162.721
162.739
162.821
162.837
162.856
162.919
162.949
163.031
163.234
163.31
163.378
163.487
163.75
164.072
164.531
164.596
164.662
164.708
166.457
166.508
166.569
166.608
166.697
167.733
167.767
167.838
167.864
167.932
167.965
168.022
168.037
168.087
168.129
168.137
168.15
168.172
168.248
168.272
168.348
168.376
168.435
168.466
168.484
168.569
168.611
168.703
168.728
168.861
168.921
168.96
169
169.11
169.136
169.17
169.224
169.387
169.749
169.801
170.191
170.347
170.392
170.497
170.729
170.758
170.767
170.877
170.901
171.028
171.085
171.117
171.156
171.238
171.364
171.411
171.447
171.482
171.511
171.575
171.914
171.964
172.015
172.069
172.107
172.199
172.229
172.293
172.363
172.609
172.759
172.85
172.979
173.11
173.23
173.257
173.34
174.16
174.169
174.281
174.33
174.372
174.419
175.078
175.183
175.216
175.234
175.272
175.281
175.304
175.383
175.392
175.405
175.428
175.452
175.466
175.495
175.553
175.579
175.644
175.654
175.734
175.741
175.77
175.816
175.829
175.85
175.933
175.971
175.977
176.037
176.167
176.269
176.292
176.54
176.571
176.576
177.016
177.083
177.111
177.187
177.217
177.355
177.492
177.864
177.913
177.96
178.008
178.034
178.242
178.378
179.387
179.504
179.555
179.572
179.588
179.624
179.669
179.706
179.793
179.958
180.019
180.034
180.055
180.076
180.206
180.221
180.336
180.422
180.615
180.636
180.744
180.963
181.287
181.332
181.407
181.47
181.586
181.741
181.941
182.062
182.169
182.195
182.278
182.567
182.705
182.738
182.782
182.807
182.814
182.848
182.854
182.89
182.967
183.001
183.022
183.078
183.113
183.134
183.249
183.314
183.331
183.439
183.619
183.659
183.709
183.753
183.829
183.86
184.009
184.108
184.228
184.259
184.301
184.326
184.383
184.408
184.433
184.523
184.613
184.686
184.829
184.858
184.91
184.943
185.069
185.099
185.139
185.174
185.243
185.454
185.489
185.514
185.578
185.668
185.771
185.805
186.002
186.029
186.148
186.157
186.223
186.237
186.265
186.293
186.35
186.379
186.391
186.514
186.614
186.648
186.702
186.758
186.831
186.887
187.048
187.078
187.131
187.167
187.191
187.205
187.275
187.283
187.305
187.337
187.383
187.435
187.482
187.776
187.935
188.052
188.068
188.166
188.268
188.336
188.456
188.607
188.687
188.803
188.872
188.882
188.916
188.93
188.978
189.005
189.029
189.107
189.134
189.167
189.289
189.384
189.413
189.525
189.738
189.773
190.844
190.968
191.403
191.693
196.197
196.231
196.309
196.331
196.369
196.381
196.392
196.472
196.533
196.544
196.624
196.636
196.695
196.713
196.724
196.767
196.814
196.897
196.926
196.937
196.97
197.132
197.161
197.237
197.265
197.34
197.373
197.411
197.419
197.52
197.614
197.648
197.664
197.747
197.824
197.831
197.896
197.952
197.995
198.021
198.048
198.141
198.147
198.176
198.22
198.246
198.259
198.287
198.303
198.369
198.387
198.458
198.5
198.628
198.803
198.99
199.128
199.207
199.238
199.248
199.319
199.333
199.426
199.446
199.484
199.529
199.593
199.71
199.853
199.885
200.008
200.057
200.388
200.489
200.542
200.55
200.746
200.775
200.808
200.841
200.881
200.91
200.921
200.95
200.996
201.01
201.019
201.033
201.051
201.089
201.111
201.178
201.209
201.219
201.393
201.493
201.57
201.792
201.807
201.892
201.909
201.919
201.93
201.968
201.978
202
202.052
202.079
202.111
202.165
202.189
202.227
202.264
202.289
202.296
202.427
202.928
202.966
203.005
203.046
203.086
203.169
203.259
203.283
203.493
203.679
203.866
204.279
204.314
204.367
204.397
204.483
204.542
204.57
204.688
204.891
205.112
206.239
206.329
206.375
206.424
206.465
206.503
206.516
206.548
206.593
206.626
206.709
206.738
206.769
206.807
206.812
206.844
206.895
206.94
206.975
207.026
207.053
207.19
207.206
207.31
207.336
207.475
207.501
207.527
207.578
207.613
207.736
207.981
208.166
208.199
208.483
208.769
208.966
209.61
209.722
209.741
209.776
209.831
209.906
209.952
209.967
209.994
210.007
210.101
210.226
210.259
210.323
210.353
210.406
210.441
210.553
210.589
210.671
210.87
210.923
210.958
211.006
211.627
211.638
212.05
212.075
212.104
212.156
212.164
212.189
212.215
212.256
212.296
212.385
212.411
212.45
212.489
212.529
212.64
212.732
212.768
212.841
212.89
212.993
213.111
213.145
213.195
213.234
213.356
213.379
213.441
213.543
214.771
214.791
214.864
214.888
214.925
215.103
215.113
215.136
215.16
215.183
215.438
215.488
215.567
215.627
215.672
215.731
215.757
215.844
215.883
215.913
216.114
216.207
216.245
216.306
216.369
216.462
216.552
216.592
216.7
216.764
216.839
216.907
216.985
217.002
217.027
217.131
217.158
217.222
217.253
217.301
217.34
217.374
217.447
217.479
217.496
217.55
217.582
217.685
217.771
217.787
217.914
217.951
217.964
217.988
218.099
218.118
218.132
218.196
218.203
218.327
218.539
218.699
218.744
218.802
218.942
219.041
219.119
219.235
219.278
219.353
219.378
219.445
219.481
219.49
219.563
219.591
219.624
219.669
219.837
219.872
219.94
219.978
220.17
220.195
220.223
220.277
220.301
220.441
[truncated: 118 more rows]

## Sheet: Panel I
ISI histogram (top)		Average Spike Waveform (bottom)
Spike_times (s)		Voltage (V)
4.6816		0
5.57052		6.44431e-06
5.72748		1.65322e-05
5.91004		2.4721e-05
6.77712		3.41143e-05
7.38272		4.43526e-05
7.78396		5.25392e-05
10.3492		6.22766e-05
10.5576		7.34287e-05
10.7591		9.12528e-05
10.9605		0.0001714
14.5284		0.000439673
14.7263		0.000973225
14.821		0.00133128
15.3312		0.000971004
15.3588		0.000227645
15.4347		-0.000442823
15.466		-0.000845373
16.0241		-0.000991797
19.1801		-0.000981881
20.5974		-0.000892255
20.6938		-0.000770139
24.2572		-0.000645248
24.353		-0.000525109
24.5427		-0.000418365
24.6924		-0.000328269
26.5769		-0.00025123
26.9142		-0.000186794
27.9017		-0.000134133
29.5522		-9.38106e-05
29.5844		-6.16672e-05
29.8386		-3.19477e-05
30.2026		-1.17999e-05
30.2763		4.29454e-06
30.2848		1.86104e-05
30.307		2.64913e-05
30.3754		3.1866e-05
30.459		3.80133e-05
30.4694		4.22129e-05
30.506		4.44943e-05
30.5726		4.63665e-05
30.6927		4.59265e-05
30.7996		4.30249e-05
30.807		4.34469e-05
30.8132		4.14915e-05
30.8192		3.89652e-05
30.8522		3.28882e-05
30.9548		3.19354e-05
30.967		2.8544e-05
30.9814		2.45525e-05
31.1426		2.04541e-05
31.236		1.45034e-05
31.3996
31.6581
31.7784
33.5195
33.6159
33.8672
33.9532
34.7509
34.7905
34.8296
34.9918
35.1223
35.2399
35.3899
35.4642
35.4687
35.6111
35.6427
35.6954
35.7307
35.776
35.8621
36.1285
36.1374
36.374
36.803
37.3153
37.4226
37.5133
37.5888
40.4162
42.2536
42.6899
42.8344
43.1082
43.2235
43.2652
43.3955
43.6421
43.7078
43.734
43.8429
43.8704
44.082
44.1568
44.5766
45.0315
45.695
45.9248
46.0151
46.0554
46.0894
46.315
46.4987
46.5368
46.6297
46.6568
46.6971
46.9262
47.0072
47.1828
47.2954
47.369
47.4429
47.4822
47.5582
47.6056
47.6419
47.6864
47.882
48.0456
48.1263
48.2088
48.2473
48.2514
48.2807
48.3167
48.523
48.6695
50.7253
50.7724
51.0555
51.1432
51.3153
51.381
51.4227
51.4478
51.5005
51.529
51.6826
52.1318
52.1864
52.2437
52.3525
52.6384
52.7727
52.792
52.9304
52.9813
53.057
53.0982
53.1333
53.1681
53.2122
53.2505
53.4293
53.4376
53.4632
53.4937
53.5136
53.5656
53.6656
53.7348
53.7713
53.8042
53.8826
53.8957
53.975
54.0426
54.0822
54.0856
54.1251
54.1859
54.2189
54.3228
54.4739
54.5216
54.6991
54.727
54.833
54.8587
54.9628
55.2145
55.2456
55.3647
55.639
55.9188
55.9544
56.1628
56.2573
56.9653
57.3176
57.3545
57.3949
57.6302
57.708
57.783
57.8786
57.917
58.3021
58.3592
58.4117
58.6133
58.7186
58.8202
59.2482
59.353
59.4189
59.4275
59.4618
59.5232
59.6494
59.7053
59.935
60.641
61.1997
61.2635
61.3241
61.4004
61.528
61.6697
61.7374
61.7427
61.7556
62.0293
62.0664
62.1712
62.2054
62.4647
62.4823
62.5052
62.5158
62.5523
62.5807
62.6112
62.6772
62.7816
62.8038
63.3378
63.531
63.568
63.6492
63.7378
63.768
64.053
64.118
64.2752
64.2873
64.388
64.5433
64.5832
64.6498
64.6824
64.7198
64.7619
64.794
64.9199
64.9822
65.1233
65.1544
65.2286
65.2618
65.2639
65.302
65.3038
65.3358
65.372
65.4484
65.5922
65.7177
65.8103
65.8462
65.9537
66.1347
66.2566
66.327
66.4576
66.5288
66.5623
66.5759
66.6454
66.6488
66.6786
66.7875
66.8708
66.904
67.1502
67.3041
67.4812
67.5456
67.6048
67.637
67.6766
68.0248
68.0905
68.2591
68.4944
68.5123
68.5591
68.6618
68.7704
68.8345
68.8485
68.9776
69.0804
69.562
69.7114
69.7558
69.7634
69.912
69.9403
69.978
69.9904
70.0908
70.1236
70.3222
70.3564
70.7431
70.7644
70.9565
70.9891
71.1007
71.2183
71.4012
71.4755
71.5286
71.5731
71.6492
71.653
71.6918
71.8031
71.8419
71.8776
71.8796
71.9576
72.0521
72.083
72.1497
72.2032
72.2926
72.3814
73.27
73.3699
73.658
73.7004
73.886
75.1371
75.483
75.6386
75.9362
75.9527
76.1383
76.4915
76.5384
76.5841
76.6
76.6918
76.6956
76.7896
76.8117
76.8239
76.8707
76.8816
76.8961
76.9231
76.9938
77.0246
77.0847
77.1104
77.225
77.2948
77.3669
77.3778
77.3942
77.749
77.7681
77.8162
77.8648
77.9578
78.1072
78.1202
78.1368
78.1698
78.5217
78.5654
78.6097
78.6436
78.7323
78.7462
78.8396
78.8553
78.8692
78.9316
79.0267
79.1264
79.1368
79.217
79.3294
79.3728
79.4141
79.45
79.5498
80.137
80.2839
80.6099
80.6414
80.723
80.7374
81.1368
81.2551
82.137
82.3037
83.0564
83.0851
83.1076
83.137
83.2933
83.3468
83.3783
83.8307
83.9217
84.1381
84.9294
84.9916
85.2417
85.314
85.482
85.5115
85.5746
85.6528
85.6793
85.6871
85.7057
85.7566
85.7687
85.7936
85.8114
85.9004
85.925
86.075
86.1125
86.2606
86.3251
86.3542
86.4907
86.5009
86.561
86.5824
86.6255
86.7282
86.819
86.8575
87.1027
87.2687
87.3542
87.3901
87.4583
87.7737
87.7804
87.8725
87.9794
88.2517
88.3184
88.3334
88.3546
88.6034
88.6203
88.7537
88.8188
88.8314
88.8416
88.8618
88.9531
88.961
88.9775
89.1211
89.1347
89.2405
89.3542
89.54
89.6552
89.7141
89.7324
89.7496
89.8204
89.8416
89.8711
89.912
90.1098
90.1855
90.2349
90.3008
90.3543
90.4673
90.7016
90.8017
90.9335
91.019
91.0641
91.0958
91.1962
91.3542
91.4261
91.5628
91.5782
91.8456
91.9057
91.9162
92.0692
92.1218
92.2353
92.2526
92.2884
92.3242
92.3527
92.3544
92.4704
92.5547
92.6203
92.6309
92.8898
92.96
93.0026
93.0556
93.1402
93.1542
93.3438
93.3554
93.3795
93.5224
94.0226
94.2182
94.3545
94.4924
94.5507
94.5881
94.6775
94.778
94.7837
94.9003
94.9309
95.0157
95.0517
95.1036
95.1389
95.3543
95.5263
95.66
95.7785
95.9288
95.9437
96.066
96.1888
96.2388
96.3311
96.3454
96.3907
96.4017
96.4276
96.5498
96.6241
96.6805
96.9274
96.957
97.0267
97.0462
97.1486
97.1544
97.1989
97.4136
97.4414
97.5219
97.5511
97.6216
97.7248
97.7612
98.1363
98.3916
98.4098
98.4612
98.5686
98.9282
99.341
99.4117
99.5543
99.7959
99.8929
99.9756
99.981
99.9941
100.076
100.196
100.233
100.246
100.26
100.706
100.761
100.888
100.908
100.915
100.988
101.061
101.095
101.16
101.268
101.423
101.527
101.55
101.756
102.456
102.51
102.537
102.581
102.594
102.698
102.821
102.833
102.854
102.864
103.121
103.334
103.363
103.511
103.516
103.541
103.59
103.689
103.767
103.791
103.852
103.875
103.914
104.042
104.106
104.232
104.309
104.335
104.605
104.641
104.688
104.767
105.025
105.049
105.062
105.084
105.105
105.252
105.369
105.39
105.57
105.619
105.637
105.666
105.733
105.759
106.031
106.094
106.147
106.179
106.208
106.219
106.318
106.321
106.357
106.401
106.435
106.498
106.554
106.569
106.707
106.723
106.737
106.743
106.914
107.212
107.269
107.276
107.294
107.319
107.354
107.529
107.649
107.676
107.786
107.912
108.023
108.056
108.167
108.576
108.672
108.695
108.7
108.736
108.789
108.797
108.824
108.846
108.858
108.865
108.908
108.948
108.957
109.024
109.053
109.068
109.078
109.143
109.154
109.208
109.236
109.245
109.3
109.33
109.433
109.55
109.582
109.626
109.743
109.763
109.856
109.861
110.053
110.077
110.139
110.154
110.173
110.179
110.195
110.237
110.257
110.266
110.284
110.298
110.314
110.322
110.416
110.458
111.586
111.641
111.755
111.77
111.898
111.91
111.958
111.994
112
112.099
112.142
112.22
112.239
112.4
112.407
112.561
112.564
112.589
112.605
112.616
112.652
112.689
112.727
112.758
112.793
112.811
112.86
112.902
112.919
112.941
112.948
112.956
112.979
112.985
112.989
112.995
113.044
113.056
113.067
113.076
113.088
113.098
113.104
113.11
113.131
113.171
113.182
113.263
113.271
113.278
113.376
113.38
113.403
113.441
113.466
113.547
113.552
113.618
113.702
113.727
113.783
113.793
113.818
113.879
113.91
113.926
113.95
113.96
114.03
114.052
114.056
114.099
114.141
114.166
114.189
114.224
114.252
114.296
114.318
114.354
114.405
114.436
114.478
114.509
114.525
114.548
114.562
114.582
114.585
114.616
114.617
114.634
114.67
114.687
114.802
114.814
114.84
114.854
114.906
114.948
114.982
115.056
115.084
115.124
115.165
115.167
115.197
115.199
115.207
115.253
115.283
115.312
115.408
115.497
115.81
115.838
115.862
115.896
115.927
115.954
115.962
116.037
116.119
116.15
116.205
116.249
116.255
116.283
116.29
116.393
116.479
116.506
116.675
116.705
116.795
116.874
116.876
116.908
116.982
116.987
117.099
117.103
117.126
117.14
117.227
117.354
117.388
117.421
117.722
117.75
117.783
117.855
118.03
118.06
118.208
118.233
118.328
118.51
118.584
118.665
118.758
118.78
118.824
118.896
118.898
118.961
119.055
119.11
119.158
119.303
119.328
119.334
119.359
119.404
119.478
119.558
119.597
119.633
119.67
119.93
119.947
119.974
120.003
120.022
120.031
120.059
120.195
120.207
120.216
120.273
120.342
120.419
120.486
121.722
121.957
121.965
122
122.115
122.144
122.238
122.278
122.372
122.379
122.412
122.444
122.453
122.464
122.508
122.551
122.56
122.603
122.698
122.739
122.777
122.821
122.897
122.998
123.032
123.07
123.101
123.12
123.18
123.224
123.248
123.287
123.302
123.353
123.4
123.425
123.468
123.572
123.591
123.604
123.655
123.866
123.892
123.916
123.923
123.932
123.953
124.045
124.059
124.078
124.162
124.165
124.179
124.316
124.4
124.409
124.554
124.595
124.601
124.688
124.716
124.813
124.818
124.882
124.888
124.922
124.923
125.004
125.038
125.116
125.142
125.217
125.243
125.373
125.554
125.601
125.627
125.68
125.793
125.809
125.823
125.972
126.021
126.235
126.294
126.382
126.427
126.455
126.488
126.505
126.684
126.69
126.71
126.772
126.807
126.838
126.88
126.884
126.972
126.98
127.014
127.04
127.082
127.118
127.152
127.214
127.253
127.28
127.315
127.32
127.358
127.408
127.436
127.478
127.51
127.55
127.586
127.597
127.622
127.665
127.7
127.731
127.738
127.796
127.835
127.855
127.931
127.964
128.051
128.081
128.096
128.325
128.347
128.496
128.533
128.537
128.567
128.613
128.631
128.661
128.755
128.801
128.838
128.886
128.918
128.941
128.954
129.06
129.1
129.138
129.183
129.212
129.284
129.367
129.514
129.582
129.587
129.629
129.773
129.824
129.927
129.969
130.05
130.105
130.139
130.169
130.273
130.37
130.405
130.456
130.552
130.581
130.657
130.683
131.403
131.623
131.636
131.682
131.687
131.729
131.778
131.827
131.859
131.946
131.974
131.977
132.039
132.049
132.143
132.147
132.178
132.204
132.253
132.297
132.345
132.364
132.435
132.462
132.482
132.495
132.605
132.756
132.802
132.817
132.905
133.043
133.079
133.15
133.156
133.199
133.346
133.432
133.529
133.563
133.64
133.646
133.66
133.687
133.719
133.771
133.806
133.922
133.952
133.998
134.031
134.045
134.093
134.132
134.168
134.269
134.41
134.543
134.573
134.669
134.728
134.904
135.027
135.148
135.261
135.299
135.573
135.713
135.872
135.926
135.982
136.027
136.084
136.133
136.371
136.461
136.491
136.569
137.122
137.203
137.21
137.349
137.365
137.482
137.491
137.727
137.834
137.954
137.999
138.111
138.197
138.232
138.244
138.332
138.376
138.387
138.394
138.458
138.491
139.039
139.116
139.149
139.155
139.166
139.354
139.393
139.416
139.427
139.492
139.604
139.636
139.834
140.194
140.197
140.201
140.334
140.477
140.491
140.524
140.633
140.731
140.788
140.833
140.901
141.022
141.073
141.15
141.221
141.491
141.537
141.826
141.851
141.957
142.144
142.194
142.491
142.68
142.823
143.084
143.169
143.204
143.303
143.332
143.372
143.422
143.444
143.455
143.473
143.491
143.566
143.693
143.718
143.813
143.859
143.927
143.937
144.072
144.202
144.249
144.335
144.376
144.434
144.459
144.487
144.491
144.603
144.631
144.739
144.742
144.777
144.869
144.921
144.927
144.997
145.068
145.115
145.129
145.141
145.217
145.245
145.371
145.39
145.493
145.96
146.104
146.179
146.186
146.219
146.229
146.242
146.36
146.828
147.252
147.764
147.893
147.912
148.529
148.936
148.964
148.98
149.033
149.077
149.329
149.333
150.001
150.149
150.153
150.161
150.17
150.18
150.792
150.934
151.221
151.289
151.406
151.413
151.423
151.53
151.724
152.101
153.08
153.095
153.142
153.187
153.217
153.298
153.652
153.693
154.074
154.084
154.098
154.102
154.111
154.12
154.13
154.198
154.224
154.239
154.265
154.285
154.369
154.391
154.402
156.124
156.129
156.137
156.14
156.354
156.751
156.768
156.775
157.05
157.067
157.5
157.63
157.699
157.704
157.735
157.759
157.77
157.78
157.787
157.827
157.831
157.978
158.064
158.273
158.322
158.328
158.333
158.66
158.663
159.622
159.628
159.631
159.636
159.638
159.641
159.644
159.647
159.65
159.654
159.663
159.794
159.877
160.019
160.026
160.2
160.713
160.768
160.791
160.802
160.809
160.825
160.839
160.845
160.852
160.857
160.869
161.941
163.107
163.171
163.179
163.202
163.261
163.286
163.302
163.327
163.333
163.599
163.92
163.93
163.951
163.971
163.989
164.102
164.125
164.348
164.359
164.377
164.396
164.414
164.428
164.436
165.55
165.698
165.727
165.747
165.907
165.916
165.968
166.703
166.729
166.742
166.755
167.479
167.683
167.688
167.846
168.388
168.406
168.783
168.79
168.956
169.004
169.198
169.217
169.234
169.238
169.477
169.507
169.512
169.524
169.722
170.071
170.075
170.089
170.101
170.223
170.238
170.249
170.26
170.265
170.268
170.274
170.464
170.47
170.479
170.484
170.489
170.495
170.498
170.5
170.503
170.506
170.511
170.519
170.523
170.658
170.713
170.725
170.735
170.789
171.176
171.301
171.334
171.503
171.51
171.514
171.524
171.552
171.561
171.567
171.579
172.443
172.455
174.778
174.788
174.794
174.799
174.805
174.917
174.958
174.977
175.146
175.296
176.532
176.556
176.659
176.672
176.677
176.826
176.846
176.938
176.999
177.005
177.057
177.157
177.181
177.185
177.244
177.257
177.466
177.503
177.582
177.593
177.603
177.714
177.816
177.836
177.84
177.849
177.934
177.951
178.112
178.145
178.155
178.17
178.197
178.233
178.239
178.244
178.26
178.29
178.345
178.351
178.403
178.427
178.464
178.491
178.535
178.563
178.633
178.637
178.688
178.695
178.808
178.845
178.862
178.95
178.967
178.974
179.093
179.11
179.13
179.22
179.35
179.459
179.475
179.581
179.609
179.717
179.728
179.74
179.744
179.756
179.834
179.906
179.955
179.999
180.02
180.058
180.094
180.099
180.117
180.205
180.22
180.227
180.229
180.235
180.24
180.248
180.255
180.318
180.336
180.34
180.345
180.389
180.401
180.426
180.506
180.514
180.522
180.53
180.541
180.552
180.561
180.578
180.595
180.607
180.615
180.623
180.694
180.701
180.71
180.719
180.764
180.784
180.808
180.848
180.851
180.863
180.887
180.892
180.962
180.992
181.054
181.082
181.097
181.103
181.138
181.173
181.184
181.191
181.216
181.289
181.312
