# Supplementary material for: Juxtacellular opto-tagging of hippocampal CA1 neurons in freely moving mice
Source: eLife. 2022 Jan 26;11:e71720. doi: 10.7554/eLife.71720 (PMC8791633; doi:10.7554/eLife.71720)
Supplement: Figure 1—source data 1. [file elife-71720-fig1-data1.xlsx]

## Sheet: Panel E
Trial number	Evoked_spike_lag (s)
1	0.00184
2	0.00196
3	0.00196
4	0.00184
5	0.002
6	0.00204
7	0.00228
8	0.00196
9	0.00228
10	0.00208
11	0.00216
12	0.0022
13	0.00208
14	0.00208
15	0.00204
16	0.00224
17	0.00228
18	0.00196
19	0.00216
20	0.00224
21	0.00216
22	0.002
23	0.00224
24	0.00204
25	0.00216
26	0.00224
27	0.00228
28	0.00208
29	0.00236
30	0.00204
31	0.00204
32	0.00224
33	0.00204
34	0.00212
35	0.002
36	0.00212
37	0.00208
38	0.0022
39	0.0022
40	0.00204
41	0.00192
42	0.00204
43	0.00216
44	0.00208
45	0.00208
46	0.00224
47	0.00212
48	0.00232
49	0.00204

## Sheet: Panel F
Id	Mean_evoked_spike_lag (s)
1	0.00298228
2	0.00201
3	0.00304857
4	0.0024432
5	0.00225159
6	0.0020728
7	0.00255422
8	0.00329231
9	0.002952
10	0.00296667
