# Supplementary material for: Juxtacellular opto-tagging of hippocampal CA1 neurons in freely moving mice
Source: eLife. 2022 Jan 26;11:e71720. doi: 10.7554/eLife.71720 (PMC8791633; doi:10.7554/eLife.71720)
Supplement: Figure 2—source data 1. [file elife-71720-fig2-data1.xlsx]

## Sheet: Panel D
1 HZ Stim
Trial number	Evoked_spike_lag (s)
1	0.0059
2	0.00574
3	0.00566
4	0.0063
5	0.00638
6	0.00702
7	0.0069
8	0.0071
9	0.00694
10	0.00678
11	0.00622
12	0.00626
13	0.00654
14	0.00702
15	0.00714
16	0.00706
17	0.0069
18	0.00682
19	0.00682
20	0.00698
21	0.00738
22	0.00782
23	0.00758
24	0.00774
25	0.00682
26	0.0075
27	0.00822
28	0.00798
29	0.00786
30	0.00826
31	0.00682
32	0.00754
33	0.0077
34	0.00698
35	0.00762
36	0.0071
37	0.00746
38	0.0083
39	0.00762
40	0.00778
41	0.00658
42	0.00758
43	0.00666
44	0.00654
45	0.00714
46	0.00698
47	0.00746
48	0.00782
49	0.00762
50	0.0087
51	0.00782
52	0.00878
53	0.00798
54	0.0077
55	0.0075
56	0.0077
57	0.00778
58	0.0091
59	0.00986
60	0.00902
61	0.00598
62	0.00746
63	0.00946
64	0.00802
65	0.00822
66	0.00754

## Sheet: Panel E
cell_id	Mean_evoked_spike_lag (s)
1	0.0068
2	0.007
3	0.0071
4	0.0074
5	0.0072
6	0.011
7	0.005
8	0.0051
9	0.0092
10	0.0049
11	0.0066

## Sheet: Panel I
25 HZ Stim			3 Hz Stim
Trial number	Evoked_spike_lag (s)		Trial number	Evoked_spike_lag (s)
1	0.00598		1	0.00468
2	0.00588		2	0.00608
3	0.0055		3	0.0052
4	0.00582		4	0.00486
5	0.00532		5	0.00526
6	0.00558		6	0.00468
7	0.00542		7	0.0046
8	0.00502		8	0.00532
9	0.00628		9	0.0049
10	0.00536		10	0.00486
11	0.00544		11	0.005
12	0.00532		12	0.00466
13	0.00524		13	0.0049
14	0.00538		14	0.00488
15	0.00536		15	0.0053
16	0.00538		16	0.00474
17	0.00538		17	0.00484
18	0.00522		18	0.00492
19	0.00504
20	0.00526
21	0.00528
22	0.00522
23	0.00544
24	0.00552
25	0.00536
26	0.00556
27	0.00544
28	0.00504
29	0.00516
30	0.00528
31	0.00554
32	0.00538
33	0.00562
34	0.00542
35	0.00548
36	0.00562
37	0.00574
38	0.0052
39	0.00544
40	0.00534
41	0.00552
42	0.00542
43	0.00546
44	0.00552
45	0.00588
46	0.00604
47	0.00614
48	0.00584
49	0.00514
50	0.0052
51	0.00526
52	0.00568
53	0.00568
54	0.0058
55	0.00586
56	0.00606
57	0.00634
58	0.00524
59	0.00562
60	0.00534
61	0.00532
62	0.00554
63	0.00546
64	0.00564
65	0.00606
66	0.00638

## Sheet: Panel J
	CA1 (direct light activation)			CA3 (mossy fibers stimulation)				CA1 (Schaffer collaterals stimulation)
	cell_id	Mean_evoked_spike_lag (s)		cell_id	Mean_evoked_spike_lag (s)			cell_id	Mean_evoked_spike_lag (s)
	1	0.004		1	0.0126			1	0.0068
	2	0.003		2	0.0059			2	0.007
	3	0.003		3	0.0066			3	0.0071
	4	0.0024		4	0.0074			4	0.0074
	5	0.0023		5	0.0086			5	0.0072
	6	0.0021		6	0.0092			6	0.011
	7	0.0026		7	0.007			7	0.005
	8	0.0033						8	0.0051
	9	0.003						9	0.0092
	10	0.003						10	0.0049
								11	0.0066
