# Supplementary material for: Juxtacellular opto-tagging of hippocampal CA1 neurons in freely moving mice
Source: eLife. 2022 Jan 26;11:e71720. doi: 10.7554/eLife.71720 (PMC8791633; doi:10.7554/eLife.71720)
Supplement: Figure 3—figure supplement 1—source data 1. [file elife-71720-fig3-figsupp1-data1.xlsx]

## Sheet: Panels C and E
	Average Spike Waveforms (V)
	Panel C	-----------------------------------Panel E (from top to bottom)-----------------------------------------------------------
Cell_id	1	2	3	4	5	6	7	8	9	10	11
	0	0	0	0	0	0	0	0	0	0	0
	-2.10084e-05	1.21491e-05	6.91229e-06	1.12698e-05	-9.10033e-06	4.02551e-07	2.55721e-06	1.81219e-05	-2.4361e-06	3.72309e-07	6.73724e-06
	-3.83674e-05	2.61264e-05	1.69098e-05	1.48946e-05	-1.03821e-06	-1.47938e-06	1.95665e-06	4.04397e-05	5.72491e-07	2.88615e-06	1.32212e-05
	-3.60479e-05	4.14799e-05	2.50696e-05	2.33967e-05	1.76841e-05	-9.78331e-06	2.69955e-07	6.4133e-05	6.42298e-06	8.09376e-06	2.60143e-05
	-2.65147e-05	5.74459e-05	3.31309e-05	3.74105e-05	6.84839e-05	-1.50825e-05	1.17128e-05	9.02529e-05	5.83582e-06	1.45724e-05	4.66881e-05
	-2.1084e-05	7.4494e-05	4.18866e-05	5.48337e-05	0.000164263	-1.71165e-06	3.09213e-05	0.000122734	5.87138e-06	3.35007e-05	8.46377e-05
	-8.16528e-06	9.36709e-05	5.04486e-05	5.99942e-05	0.0002965	1.94765e-05	5.11957e-05	0.000158022	1.44611e-05	8.15447e-05	0.000165372
	3.9749e-05	0.000118277	6.22809e-05	8.56957e-05	0.000436837	3.61484e-05	0.000114133	0.000208423	2.63317e-05	0.000176316	0.000296922
	0.00027054	0.000169634	7.9091e-05	0.000154864	0.000560241	0.00010541	0.000266738	0.000347695	7.42298e-05	0.000311794	0.000448965
	0.000680142	0.000377287	0.00013748	0.000356884	0.000688324	0.000346309	0.000481541	0.000737092	0.000174089	0.000446828	0.000610317
	0.00113852	0.000835186	0.000415449	0.000668028	0.000927312	0.000721461	0.0007003	0.00142382	0.000274784	0.000539874	0.000793815
	0.00189607	0.00158202	0.00101521	0.00117816	0.00143764	0.00111687	0.000982876	0.00262558	0.000402582	0.000648807	0.00112162
	0.00318028	0.0028503	0.0019826	0.00185559	0.00195975	0.00164358	0.00144421	0.00437407	0.000608172	0.000928893	0.00160816
	0.00377535	0.00351893	0.00254277	0.00216624	0.00214168	0.00193677	0.00167488	0.00510832	0.000727519	0.00114357	0.0018246
	0.00353771	0.00300008	0.00204077	0.00197172	0.00202919	0.00176656	0.00149858	0.00462961	0.00061649	0.0009563	0.00169123
	0.00305311	0.00186951	0.000950214	0.00164077	0.00181894	0.00144474	0.00120549	0.00369987	0.00041825	0.000623489	0.00146
	0.00257202	0.000595707	-0.000161141	0.00131676	0.00158018	0.0011084	0.000934456	0.00268298	0.000233905	0.000350408	0.00122137
	0.00214744	-0.00047679	-0.00101778	0.00104319	0.00134955	0.000802507	0.000705016	0.00175588	9.8271e-05	0.00016565	0.00099554
	0.00177328	-0.0012277	-0.00150814	0.000826878	0.00114169	0.000530311	0.000522014	0.000982176	1.02978e-05	4.1421e-05	0.000791373
	0.00146522	-0.00160513	-0.00163229	0.000633541	0.000957337	0.000317705	0.000368375	0.000329973	-5.59035e-05	-4.4158e-05	0.00061555
	0.0011955	-0.00168698	-0.00153265	0.000475292	0.000800831	0.000147142	0.000246091	-0.000253224	-0.000127912	-0.000100907	0.000460273
	0.00095456	-0.00160979	-0.0013332	0.000346175	0.000664825	-1.1985e-05	0.000142104	-0.0007689	-0.000189396	-0.000142596	0.000317349
	0.000736935	-0.0014622	-0.00110755	0.000220651	0.000546544	-0.000148947	4.63544e-05	-0.00119056	-0.000225808	-0.000176966	0.00017889
	0.000500642	-0.00129081	-0.000889775	8.97154e-05	0.000438512	-0.000263234	-5.28952e-05	-0.0014993	-0.000245177	-0.000220433	4.54388e-05
	0.000263304	-0.00111291	-0.000692303	-5.73249e-05	0.000338229	-0.000354056	-0.000140885	-0.00169368	-0.000252599	-0.000265883	-8.48871e-05
	1.85871e-05	-0.000941922	-0.000520345	-0.000192949	0.000241034	-0.000444756	-0.000233875	-0.00178232	-0.000240878	-0.000313968	-0.000201403
	-0.000219195	-0.000782982	-0.000377244	-0.000335073	0.000153433	-0.000505126	-0.000322251	-0.00178381	-0.000213813	-0.000356265	-0.000312282
	-0.000449395	-0.000637323	-0.000259511	-0.000468293	7.10321e-05	-0.000533525	-0.000387961	-0.00171915	-0.000188058	-0.000390935	-0.00040456
	-0.000646743	-0.000506349	-0.000162822	-0.000603542	-5.14534e-06	-0.000538243	-0.00043672	-0.00160351	-0.000159633	-0.000417755	-0.000473524
	-0.000813038	-0.000389097	-8.47261e-05	-0.000695627	-7.70366e-05	-0.000532567	-0.000454454	-0.00145558	-0.00013013	-0.000424167	-0.000524075
	-0.000902845	-0.000285448	-2.20443e-05	-0.000751297	-0.000138428	-0.000475839	-0.000451389	-0.00128862	-9.89581e-05	-0.000414165	-0.000549971
	-0.000935544	-0.000194211	2.74845e-05	-0.000782679	-0.000191022	-0.00040468	-0.000430659	-0.00110948	-6.87207e-05	-0.000372413	-0.000545297
	-0.000923406	-0.000113416	6.49678e-05	-0.000784231	-0.000222102	-0.000341456	-0.000379336	-0.000927103	-5.09429e-05	-0.000316822	-0.000519673
	-0.00085229	-4.44114e-05	9.36141e-05	-0.00071035	-0.000234026	-0.000277353	-0.000319911	-0.000747392	-3.15343e-05	-0.000258041	-0.000476661
	-0.000753266	1.45669e-05	0.000114996	-0.000601246	-0.000230224	-0.000210772	-0.000261762	-0.000575446	-9.2473e-06	-0.000192829	-0.000418444
	-0.000641899	6.61612e-05	0.000129827	-0.000519274	-0.000209959	-0.000131589	-0.000189945	-0.000415013	6.08481e-06	-0.000122101	-0.00035302
	-0.000513836	0.000110545	0.000140252	-0.00041247	-0.000177144	-7.52713e-05	-0.00012396	-0.00026425	2.04472e-05	-5.85989e-05	-0.000281868
	-0.000362938	0.000148852	0.000146154	-0.000305289	-0.000136657	-2.33448e-05	-6.26489e-05	-0.00012476	3.28597e-05	-2.2694e-06	-0.000212363
	-0.000204503	0.00017924	0.000150994	-0.000202995	-8.8824e-05	2.78525e-05	-5.02764e-06	5.30568e-06	4.5015e-05	4.40159e-05	-0.000142825
	-6.24595e-05	0.000203827	0.000152561	-0.000108517	-3.34318e-05	7.27299e-05	4.02178e-05	0.000118084	5.57579e-05	8.41917e-05	-8.00288e-05
	3.94543e-05	0.000223803	0.000150474	-2.0443e-05	2.77986e-05	0.00011189	8.39651e-05	0.000217352	6.4037e-05	0.000122932	-1.45234e-05
	0.000155074	0.000241235	0.000146517	6.60967e-05	8.98797e-05	0.00014759	0.000129916	0.000308471	7.02633e-05	0.000144597	4.52649e-05
	0.000266628	0.000253271	0.000143065	0.000132139	0.000148867	0.000182654	0.000158675	0.000390943	7.65754e-05	0.000164039	9.73398e-05
	0.000356662	0.000261599	0.000137881	0.000185942	0.000201787	0.000221107	0.000180201	0.000458826	8.04421e-05	0.000180992	0.000146779
	0.000434627	0.000266836	0.000132723	0.000231035	0.00025547	0.000232395	0.000208241	0.00051767	7.77836e-05	0.00019703	0.000191228
	0.000523397	0.000271153	0.000127141	0.000279222	0.000308498	0.000255528	0.000243319	0.000567568	8.02226e-05	0.000205199	0.000229765
	0.000591703	0.000271942	0.00012099	0.000316863	0.000350945	0.000273421	0.000263564	0.000608825	8.27709e-05	0.000209008	0.000267679
	0.000645844	0.000269038	0.000113979	0.000343253	0.000392845	0.000276373	0.000278445	0.000642749	8.3982e-05	0.000206155	0.000300934
	0.000667316	0.000267199	0.000104706	0.000369251	0.000430385	0.000284953	0.000293106	0.000667935	8.54863e-05	0.000202984	0.00032874
	0.000715189	0.000263437	9.74592e-05	0.000379232	0.000463864	0.000301961	0.000302541	0.000689613	8.74765e-05	0.000203633	0.000352863
	0.000743473	0.000255457	8.96696e-05	0.000399483	0.00049271	0.000303345	0.0003071	0.000703775	8.94852e-05	0.000204793	0.000369455
	0.000786563	0.00024662	8.12289e-05	0.000421456	0.000519503	0.000300201	0.000316331	0.000712981	8.84818e-05	0.000201071	0.000381903
