# Supplementary material for: Juxtacellular opto-tagging of hippocampal CA1 neurons in freely moving mice
Source: eLife. 2022 Jan 26;11:e71720. doi: 10.7554/eLife.71720 (PMC8791633; doi:10.7554/eLife.71720)
Supplement: Figure 3—source data 1. [file elife-71720-fig3-data1.xlsx]

## Sheet: Panel K
Calb1-neg
	cell_iD	Average FR (Hz)	Peak FR (Hz)	Spatial Info (bits/spike)	Sparsity Index	Correlation (1st vs 2nd half)
	1	0.6794	5.6602	1.5641	0.2459	0.1704
	2	2.7279	18.2623	1.898	0.217	0.8249
	3	4.2303	35.2413	1.8152	0.2091	0.9474
	4	6.75	28.4683	0.9736	0.4297	0.9412
	5	0.1693	1.0951	1.3709	0.2951	0.7157
	6	8.4823	36.0451	1.0775	0.3786	0.9825
	7	1.7376	8.3735	0.8034	0.4734	-0.1033
	8	1.5379	10.3332	2.4629	0.1675	0.7784
	9	5.6287	25.0773	0.9484	0.3721	0.9728
	10	0.5001	3.3522	1.9834	0.1914	0.4331
	11	3.2623	19.7338	0.1523	0.8221	-0.0159
	12	0.6034	7.1359	2.569	0.1277	0.7519
	13	0.9011	8.839	2.3713	0.1545	0.9773
	14	3.4377	12.8423	0.4065	0.6714	0.7279
	15	1.0573	8.6787	1.8284	0.1963	0.7866
	16	6.8715	37.5029	2.0038	0.1935	0.8739
	17	1.0458	6.2895	1.5315	0.246	0.6343
	18	0.5611	8.937	0.4704	0.483	0.5451
	19	4.5134	15.7765	1.5332	0.2808	0.71
	20	2.6751	9.1488	1.5095	0.2915	0.6381
	21	0.7923	5.1817	1.5847	0.2667	0.8158
	22	1.6501	9.5206	3.501	0.1134	0.9168
	23	3.5021	18.3291	0.654	0.4454	0.8942
	24	0.4862	3.9215	2.7303	0.1353	0.9723
	25	2.634	12.2402	1.0012	0.3828	0.101
	26	1.1058	12.03	2.0305	0.1856	0.7483
Calb1-pos
	1	1.0879	4.4493	0.8493	0.4498	-0.0241
	2	1.4069	6.0227	0.4636	0.5826	-0.1646
	3	0.7254	3.3944	0.7964	0.4851	-0.2433
	4	0.6198	3.2328	0.4984	0.6048	0.5023
	5	1.7016	13.5364	0.8898	0.3887	0.5785
	6	1.7479	6.8048	0.797	0.4143	0.2247
	7	0.4062	1.5193	1.5025	0.2806	0.392
	8	4.0821	21.8611	0.6467	0.4838	0.8691
	9	3.2787	6.1439	0.4062	0.6472	0.3885
	10	3.4597	14.4208	0.2151	0.7757	0.7039
	11	1.4191	6.3133	0.5399	0.5308	0.6233
	12	6.4629	14.21	0.2353	0.7499	0.068
